# Supplementary material
Source: PubMed Central journal article supplement (PMC7039657)
Supplement: NIHMS1551421-supplement-SI.pdf [file NIHMS1551421-supplement-SI.pdf]

## Supporting Information

### Indoor versus Outdoor Air Quality During Wildfires

KP Messier<sup>1</sup>, LG Tidwell<sup>1</sup>, CC Ghetu<sup>1</sup>, D Rohlman<sup>3</sup>, RP Scott<sup>1</sup>, LM Bramer<sup>4</sup>, HM Dixon<sup>1</sup>, KM Waters<sup>2</sup>, KA Anderson\*<sup>1</sup>

<sup>1</sup>Department of Environmental and Molecular Toxicology, Oregon State University, Corvallis, Oregon, 97331, United States of America

<sup>2</sup>Biological Sciences Division, Pacific Northwest National Laboratory, Richland, Washington, 99352, United States of America

<sup>3</sup>College of Public Health and Human Sciences, Oregon State University, Corvallis, Oregon, 97331, United States of America

<sup>4</sup>Computational Analytics Division, Pacific Northwest National Laboratory, Richland, 99352, Washington, United States of America

\*Corresponding author: kim.anderson@oregonstate.edu

#### 1. Monitoring Site Descriptions

Site descriptions for each volunteer location are provided below. To protect volunteer identity, descriptions do not include any unique identifiers.

Site A: Mixed residential and business downtown neighborhood; Single-family home converted to small business; Outside sampler in backyard; Inside sampler in main living area.

Site B: Residential neighborhood; 2<sup>nd</sup> floor of Multi-family apartment homes; Outside sampler in outside patio; Inside sampler in bedroom.

Site C: Residential neighborhood; Loft-style garage-house; Outside sampler in backyard; Inside sampler in main living area that is separate, but open to bedroom and kitchen area.

Site D: Residential neighborhood; Single-family home; Outside sampler in backyard; Inside sampler in bedroom.

Site E: Residential neighborhood; Single-family home; Outside sampler in backyard; Inside sampler in bedroom.

Site F: Downtown neighborhood; Small business; Outside sampler on porch set back from main street; Inside sampler in main room of business.

## Tables

Table S1. The Log-K<sub>oa</sub>, toxicity equivalency factor (TEF), limit of detection (LOD) for indoor (nmol·m<sup>-3</sup>), limit of detection for outdoor, and molecular weight (MW) (g·mol<sup>-1</sup>) for all 63 PAHs.

| Analyte                        | LogKoa | TEF   | LOD <sub>indoor</sub> | LOD <sub>outdoor</sub> | MW    |
|--------------------------------|--------|-------|-----------------------|------------------------|-------|
| <i>naphthalene</i>             | 5.05   | 0.001 | 1.21E-02              | 7.85E-03               | 128.2 |
| <i>2-methylnaphthalene</i>     | 5.53   | 0.001 | 1.69E-03              | 1.06E-03               | 142.2 |
| <i>1-methylnaphthalene</i>     | 5.55   | 0.001 | 6.61E-04              | 4.12E-04               | 142.2 |
| <i>2,6-dimethylnaphthalene</i> | 5.89   | 0.001 | 7.12E-04              | 4.80E-04               | 156.2 |
| <i>1,2-dimethylnaphthalene</i> | 5.89   | 0.001 | 7.52E-04              | 5.07E-04               | 156.2 |
| <i>2-ethylnaphthalene</i>      | 6.04   | 0.001 | 7.62E-04              | 5.10E-04               | 156.1 |
| <i>acenaphthene</i>            | 6.04   | 0.001 | 1.09E-03              | 7.54E-04               | 154.2 |
| <i>1,4-dimethylnaphthalene</i> | 6.17   | 0.001 | 8.51E-04              | 5.81E-04               | 156.2 |
| <i>1,8-dimethylnaphthalene</i> | 6.22   | 0.001 | 7.34E-04              | 4.73E-04               | 156.2 |
| <i>1,5-dimethylnaphthalene</i> | 6.22   | 0.001 | 7.96E-04              | 5.45E-04               | 156.2 |
| <i>acenaphthylene</i>          | 6.27   | 0.001 | 8.26E-04              | 6.37E-04               | 152.2 |
| <i>2,6-diethylnaphthalene</i>  | 6.59   | 0.001 | 1.86E-04              | 1.45E-04               | 184.3 |
| <i>fluorene</i>                | 6.59   | 0.001 | 5.51E-04              | 2.77E-04               | 166.2 |
| <i>anthracene</i>              | 7.09   | 0.01  | 1.88E-04              | 1.67E-04               | 178.2 |
| <i>phenanthrene</i>            | 7.22   | 0.001 | 1.71E-04              | 7.01E-05               | 178.2 |
| <i>dibenzothiophene</i>        | 7.24   | 0.001 | 3.82E-05              | 3.09E-05               | 184.3 |
| <i>2-methylphenanthrene</i>    | 7.50   | 0.001 | 5.26E-05              | 4.80E-05               | 192.3 |
| <i>2-methylanthracene</i>      | 7.64   | 0.01  | 5.95E-05              | 4.87E-05               | 192.3 |
| <i>1-methylphenanthrene</i>    | 7.78   | 0.001 | 1.27E-04              | 1.04E-04               | 192.3 |
| <i>9-methylanthracene</i>      | 7.87   | 0.01  | 1.01E-04              | 8.28E-05               | 192.3 |

|                                       |       |       |          |          |       |
|---------------------------------------|-------|-------|----------|----------|-------|
| <i>2,3-dimethylanthracene</i>         | 8.03  | 0.01  | 3.41E-05 | 2.81E-05 | 206.3 |
| <i>3,6-dimethylphenanthrene</i>       | 8.03  | 0.001 | 4.22E-05 | 3.47E-05 | 206.3 |
| <i>pyrene</i>                         | 8.19  | 0.001 | 4.24E-05 | 4.15E-05 | 202.3 |
| <i>9,10-dimethylanthracene</i>        | 8.28  | 0.01  | 7.77E-05 | 6.41E-05 | 206.3 |
| <i>benzo[a]fluorene</i>               | 8.36  | 0.001 | 1.41E-04 | 1.17E-04 | 216.2 |
| <i>benzo[c]fluorene</i>               | 8.37  | 0.001 | 2.54E-05 | 2.10E-05 | 216.2 |
| <i>fluoranthene</i>                   | 8.60  | 0.001 | 1.01E-04 | 3.67E-04 | 202.3 |
| <i>retene</i>                         | 8.70  | 0.001 | 1.31E-04 | 7.79E-05 | 234.3 |
| <i>1-methylpyrene</i>                 | 8.91  | 0.001 | 2.64E-05 | 2.19E-05 | 216.3 |
| <i>benz[a]anthracene</i>              | 9.07  | 0.1   | 4.66E-05 | 3.85E-05 | 228.3 |
| <i>chrysene</i>                       | 9.48  | 0.01  | 2.69E-05 | 2.22E-05 | 228.3 |
| <i>benzo[b]fluorene</i>               | 9.57  | 0.001 | 9.20E-05 | 7.60E-05 | 216.2 |
| <i>7,12-dimethylbenz[a]anthracene</i> | 9.61  | 0.01  | 4.29E-05 | 3.55E-05 | 256.3 |
| <i>6-methylchrysene</i>               | 9.72  | 0.01  | 4.14E-05 | 3.42E-05 | 242.3 |
| <i>5-methylchrysene</i>               | 9.72  | 0.01  | 7.77E-05 | 6.43E-05 | 242.3 |
| <i>perylene</i>                       | 10.08 | 0.001 | 3.93E-05 | 3.25E-05 | 252.3 |
| <i>cyclopenta[cd]pyrene</i>           | 10.15 | 0.001 | 2.26E-05 | 1.87E-05 | 226.3 |
| <i>benzo[b]fluoranthene</i>           | 10.35 | 0.1   | 1.32E-05 | 1.09E-05 | 252.3 |
| <i>benzo[j]fluoranthene</i>           | 10.59 | 0.1   | 1.83E-05 | 1.52E-05 | 252.3 |
| <i>triphenylene</i>                   | 10.69 | 0.001 | 1.44E-05 | 1.19E-05 | 228.3 |
| <i>benzo[k]fluoranthene</i>           | 10.73 | 0.1   | 1.65E-05 | 1.37E-05 | 252.3 |
| <i>benzo[a]pyrene</i>                 | 10.86 | 1     | 3.51E-05 | 2.91E-05 | 252.3 |
| <i>benzo[e]pyrene</i>                 | 11.35 | 1     | 1.78E-05 | 1.47E-05 | 252.3 |

|                                        |       |       |          |          |       |
|----------------------------------------|-------|-------|----------|----------|-------|
| <i>benzo[ghi]perylene</i>              | 11.50 | 0.01  | 7.37E-06 | 6.10E-06 | 276.3 |
| <i>indeno[1,2,3-cd]pyrene</i>          | 11.55 | 0.1   | 5.54E-06 | 4.58E-06 | 276.3 |
| <i>dibenzo[a,h]anthracene</i>          | 11.78 | 1     | 1.99E-05 | 1.64E-05 | 278.3 |
| <i>benzo[a]chrysene</i>                | 11.81 | 0.01  | 1.43E-05 | 1.18E-05 | 278.4 |
| <i>anthanthrene</i>                    | 12.31 | 0.001 | 5.36E-06 | 4.44E-06 | 276.3 |
| <i>dibenzo[a,h]pyrene</i>              | 12.77 | 10    | 6.56E-06 | 5.43E-06 | 302.4 |
| <i>dibenzo[a,i]pyrene</i>              | 12.77 | 10    | 1.79E-05 | 1.48E-05 | 302.4 |
| <i>naphtho[2,3-j]fluoranthene</i>      | 12.77 | 0.001 | 2.11E-05 | 1.74E-05 | 302.4 |
| <i>benzo[b]perylene</i>                | 12.77 | 0.01  | 2.11E-05 | 1.74E-05 | 302.4 |
| <i>naphtho[2,3-a]pyrene</i>            | 12.77 | 0.001 | 2.11E-05 | 1.74E-05 | 302.4 |
| <i>naphtho[1,2-b]fluoranthene</i>      | 12.77 | 0.001 | 2.11E-05 | 1.74E-05 | 302.4 |
| <i>dibenzo[e,l]pyrene</i>              | 12.77 | 10    | 2.11E-05 | 1.74E-05 | 302.4 |
| <i>naphtho[2,3-k]fluoranthene</i>      | 12.77 | 0.001 | 2.11E-05 | 1.74E-05 | 302.4 |
| <i>naphtho[2,3-e]pyrene</i>            | 12.77 | 0.001 | 2.11E-05 | 1.74E-05 | 302.4 |
| <i>dibenzo[a,e]fluoranthene</i>        | 12.77 | 0.1   | 5.93E-06 | 4.90E-06 | 302.4 |
| <i>dibenzo[a,l]pyrene</i>              | 13.20 | 10    | 5.20E-06 | 4.30E-06 | 302.4 |
| <i>dibenzo[a,e]pyrene</i>              | 13.20 | 1     | 6.98E-05 | 5.77E-05 | 302.4 |
| <i>coronene</i>                        | 13.70 | 0.001 | 6.39E-06 | 5.29E-06 | 300.4 |
| <i>1,6 and 1,3-Dimethylnaphthalene</i> | NA    | NA    | NA       | NA       | 156.2 |
| <i>benz[j]and[e]aceanthrylene</i>      | NA    | NA    | NA       | NA       | 252.3 |

## Figures

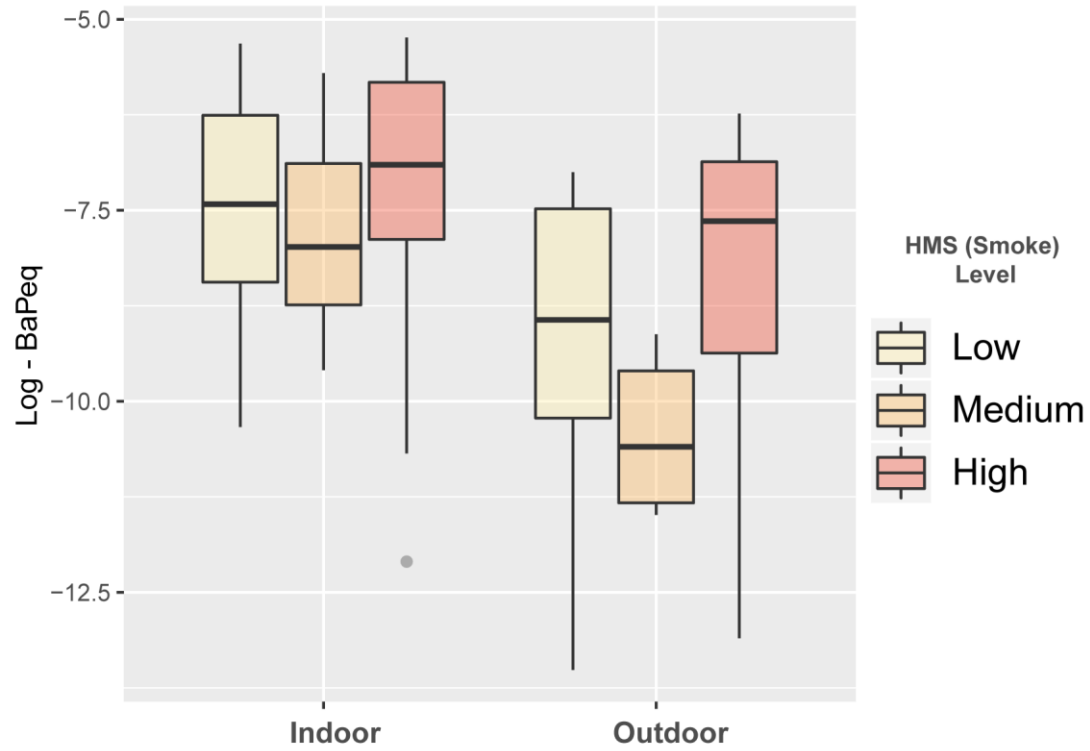

Figure S1. Boxplot of the log-transformed toxicity equivalency scaling factors (TEF) versus indoor/outdoor and by the 3 levels of wildfire smoke measure in the NOAA Hazard Mapping System (shaded colors).
